# Supplementary material for: Prediction models for acute kidney injury in patients with gastrointestinal cancers: a real-world study based on Bayesian networks
Source: PubMed Central journal article supplement (PMC7472473; doi:10.1080/0886022x.2020.1810068), 2020-08-25
Supplement: IRNF_A_1810068_SM4562.pdf [file IRNF_A_1810068_SM4562.pdf]

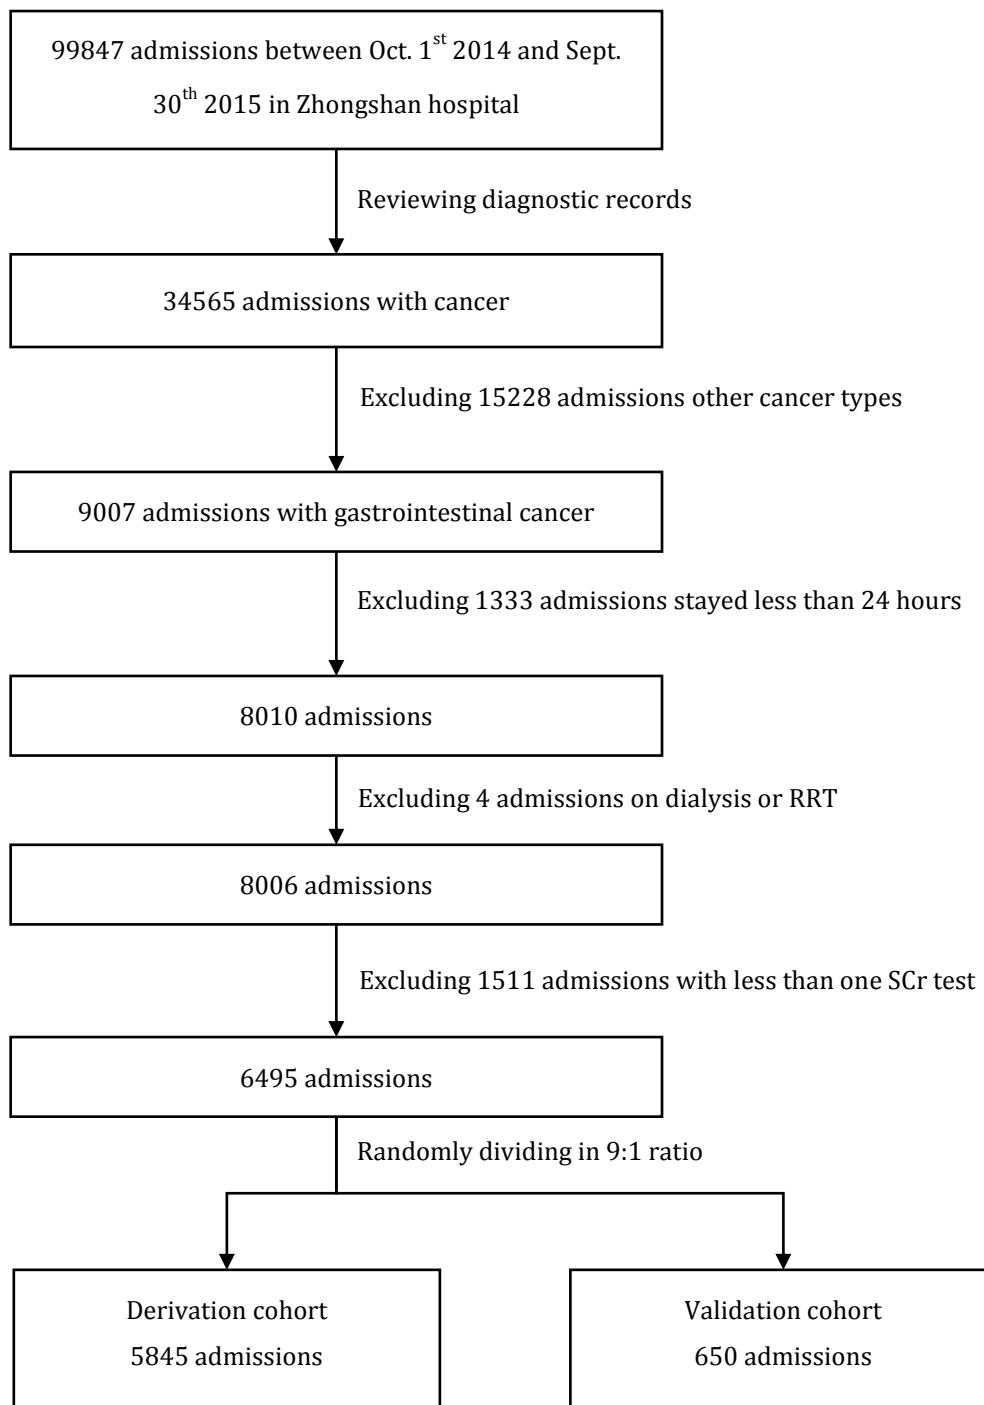

**Supplement Figure 1. Flow chart of the study population selection**

**Supplement Table 1. Demographic and clinical features in derivation and validation cohorts**

| Variate                                | Derivation cohort<br>(n=5845) | Validation cohort<br>(n=650) | $\chi^2$ | p-value |
|----------------------------------------|-------------------------------|------------------------------|----------|---------|
| <b>AKI</b>                             |                               |                              |          |         |
| Yes                                    | 837(14.3)                     | 103(15.5)                    | 0.703    | 0.402   |
| No                                     | 5008(85.7)                    | 549(84.5)                    |          |         |
| <b>Age</b>                             |                               |                              |          |         |
| <49 yr                                 | 907(15.5)                     | 91(14.0)                     | 1.678    | 0.795   |
| 50~59 yr                               | 1446(24.7)                    | 162(24.9)                    |          |         |
| 60~69 yr                               | 2087(35.7)                    | 230(35.4)                    |          |         |
| 70~79 yr                               | 1104(18.9)                    | 133(20.5)                    |          |         |
| ≥80 yr                                 | 301(5.1)                      | 34(5.2)                      |          |         |
| <b>Gender</b>                          |                               |                              |          |         |
| Male                                   | 3985(68.2)                    | 423(65.1)                    | 2.579    | 0.108   |
| Female                                 | 1860(31.8)                    | 227(34.9)                    |          |         |
| <b>BMI</b>                             |                               |                              |          |         |
| <18.4                                  | 726(12.4)                     | 73(11.2)                     | 9.282    | 0.026   |
| 18.5~23.9                              | 3176(54.3)                    | 356(54.8)                    |          |         |
| 24.0~27.9                              | 1511(25.9)                    | 152(23.4)                    |          |         |
| ≥28.0                                  | 432(7.4)                      | 69(10.6)                     |          |         |
| <b>Comorbidities</b>                   |                               |                              |          |         |
| Hypertension                           | 683(11.7)                     | 74(11.4)                     | 0.051    | 0.821   |
| Diabetes                               | 348(6.0)                      | 36(5.5)                      | 0.181    | 0.670   |
| <b>Cancer Stage</b>                    |                               |                              |          |         |
| Loco-regional                          | 5338(91.3)                    | 598(92.0)                    | 0.338    | 0.561   |
| Metastases                             | 507(8.7)                      | 52(8.0)                      |          |         |
| <b>Cancer Position</b>                 |                               |                              |          |         |
| Esophagus                              | 908(15.5)                     | 92(14.2)                     | 3.532    | 0.171   |
| Stomach                                | 2453(42.0)                    | 257(39.5)                    |          |         |
| Intestine                              | 2484(42.5)                    | 301(46.3)                    |          |         |
| <b>In-hospital Condition</b>           |                               |                              |          |         |
| Emergent                               | 554(9.5)                      | 54(8.3)                      | 0.945    | 0.331   |
| Normal                                 | 5291(90.5)                    | 596(91.7)                    |          |         |
| <b>Treatment</b>                       |                               |                              |          |         |
| Surgery                                | 2859(48.9)                    | 349(53.7)                    | 6.693    | 0.082   |
| Chemotherapy                           | 2179(37.3)                    | 217(33.4)                    |          |         |
| Interventional                         | 516(8.8)                      | 59(9.1)                      |          |         |
| Untreated/palliative                   | 291(5.0)                      | 25(3.8)                      |          |         |
| <b>Liver Function</b>                  |                               |                              |          |         |
| ALT (≥80 U/L)                          | 311(5.3)                      | 33(5.1)                      | 0.069    | 0.792   |
| AST (≥70 U/L)                          | 272(4.7)                      | 38(5.8)                      | 1.830    | 0.176   |
| TBiL(≥20.4 μmol/L)                     | 508(8.7)                      | 58(8.9)                      | 0.040    | 0.842   |
| <b>Renal Function</b>                  |                               |                              |          |         |
| SCr(≥115 μmol/L)                       | 209(3.6)                      | 22(3.4)                      | 0.062    | 0.803   |
| eGFR(≥90 mL/min/1.73m <sup>2</sup> )   | 3263(55.8)                    | 355(54.6)                    | 0.395    | 0.821   |
| eGFR(60~89 mL/min/1.73m <sup>2</sup> ) | 2282(39.0)                    | 262(40.3)                    |          |         |
| eGFR(≤59 mL/min/1.73m <sup>2</sup> )   | 300(5.1)                      | 33(5.1)                      |          |         |
| SUA(≤359 μmol/L)                       | 4670(79.9)                    | 516(79.4)                    | 6.240    | 0.100   |
| SUA(360~420 μmol/L)                    | 709(12.1)                     | 82(12.6)                     |          |         |
| SUA(421~480 μmol/L)                    | 300(5.1)                      | 42(6.5)                      |          |         |
| SUA(≥481 μmol/L)                       | 166(2.8)                      | 10(1.5)                      |          |         |
| <b>Biochemical Test</b>                |                               |                              |          |         |
| Hypoalbuminemia                        | 1960(33.5)                    | 245(37.7)                    | 4.513    | 0.034   |
| Anemia                                 | 4205(71.9)                    | 461(70.9)                    | 0.300    | 0.584   |
| Hyponatremia                           | 1290(22.1)                    | 153(23.5)                    | 1.246    | 0.536   |
| Hypernatremia                          | 113(1.9)                      | 15(2.3)                      |          |         |
| Hypokalemia                            | 796(13.6)                     | 83(12.8)                     | 0.433    | 0.805   |
| Hyperkalemia                           | 90(1.5)                       | 11(1.7)                      |          |         |

AKI: Acute kidney injury; BMI: Body mass index; ALT: Alanine aminotransferase; AST: Aspartate aminotransferase; TBiL: Total Bilirubin; SCr: Serum creatinine; eGFR: estimated Glomerular filtration rate; SUA: Serum uric acid.

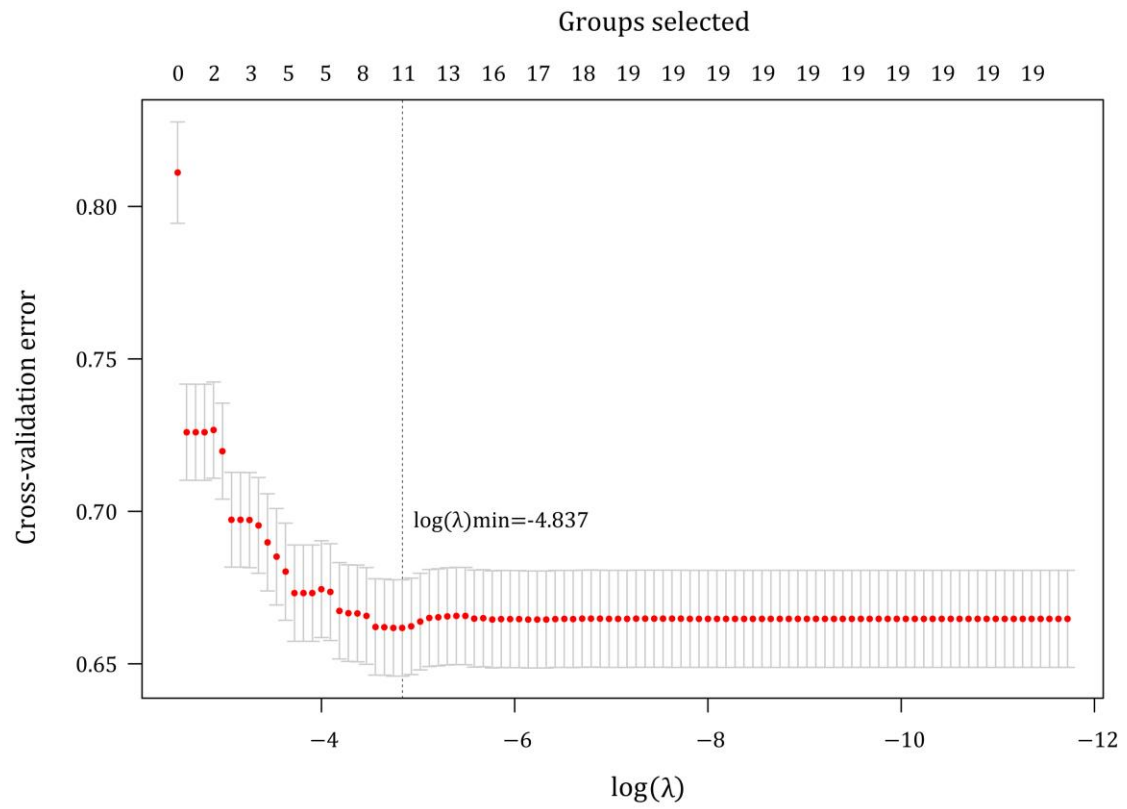

Supplement Figure 2. AKI candidate variable selection by using LASSO regression

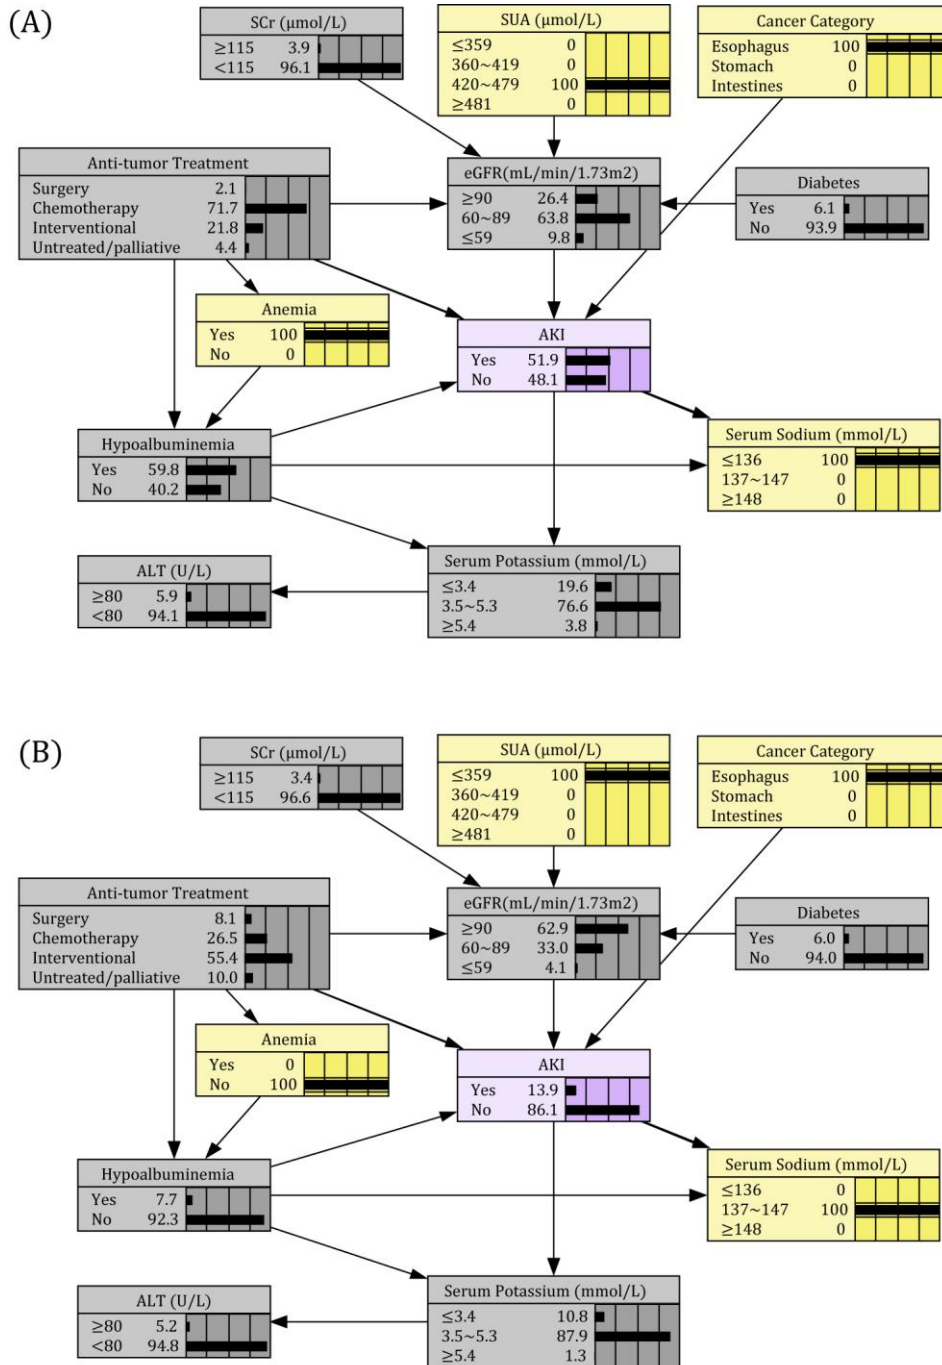

**Supplement Figure 3.** Bayesian network inference in the given evidence variables (3A: AKI incidence was estimated in given evidence variables of cancer category, hemoglobin, serum uric acid and serum sodium. 3B: AKI incidence was estimated in patients with similar diagnosis but without biochemical abnormalities.)

AKI: Acute kidney injury; ALT: Alanine aminotransferase; SCr: Serum creatinine; eGFR: estimated Glomerular filtration rate; SUA: Serum uric acid.

Supplement Text 1. R codes to perform BNs and machine learning techniques.

```
#----- Data loading -----#

setwd("C:\\Users\\Desktop")
aki <- read.csv(file="aki.csv")
n <- dim(aki)[1]
p <- dim(aki)[2]
n1 <- table(aki$AKI)[1]
n2 <- table(aki$AKI)[2]

#---- Making derivation and validation data sets ----#

set.seed(2020)
head(aki)
sample1 <- sample(which(aki$AKI==0), round(n1/10), replace=F)
sample2 <- sample(which(aki$AKI==1), round(n2/10), replace=F)
dc_sample <- c(sample1,sample2)
aki_dc <- aki[dc_sample,]
aki_vc <- aki[-dc_sample,]

#-----Transfer the data format from "numeric" to "factor"-----#

for (i in 1:n) {
  aki_dc[,i] <- as.factor(aki_dc[,i])
}
summary(aki_dc)

for (i in 1:n) {
  aki_vc[,i] <- as.factor(aki_vc[,i])
}
summary(aki_vc)

#-----AKI candidate variable selection by using LASSO regression-----#

install.packages("grpreg")
library(grpreg)

aki_glasso <- read.csv(file="aki_glasso.csv")
group=as.factor(c("AGE", "AGE", "AGE", "AGE","GENDER","BMI","BMI","BMI","HBP",
"DM","SITE","SITE","ZY","INHOS","TREAT", "TREAT","TREAT","AST", "ALT","TBIL", "SCR",
"GFR","GFR", "UA", "UA", "UA", "ALB", "HGB","WBC","N","N","K","K"))
x <- as.matrix(aki_glasso[,1:33])
y <- aki_glasso$AKI
```

```

set.seed(2020)

fit <- cv.gprreg(x, y, group, penalty="grLasso",
family="binomial",nfolds=10,returnY=FALSE, trace=FALSE)
plot(fit,bty="o")
exp(coef(fit))
log(fit$lambda.min)

aki_dc_lasso <- read.csv(file="aki_dc_lasso.csv")
for (i in 1:12) {
  aki_dc_lasso[,i] <- as.factor(aki_dc_lasso[,i])
}
str(aki_dc_lasso)

logit_form = as.formula(paste("aki_dc_lasso$AKI~ ",paste(names(aki_dc_lasso[,
1]),collapse='+')))
logit_gprlasso <- glm(logit_form,data=aki_dc_lasso,family=binomial(link = "logit"))
exp(logit_gprlasso$coefficients); exp(confint(logit_gprlasso))

#-----Bayesian networks modeling-----#

install.packages(c("bnlearn","Rgraphviz","gRain","ggplot2","ROCR"))

library("bnlearn")
library("Rgraphviz")
library("ggplot2")
library("ROCR")

# structure learning
aki_dc_bn <- read.csv(file="aki_dc_lasso_bn.csv")

bn_structure <- tabu(aki_dc_bn, score = "bic", tabu = 10, max.tabu = 5, max.iter = Inf, maxp
= Inf, optimized = TRUE)
graphviz.plot(bn_structure)
bn_structure

# parameter learning
bn_model <- bn.fit(bn_structure,aki_dc_bn, method = "mle")

# BNs model inference
cpquery(bn_model, event = (AKI == "A1"),evidence = ( SITE=="A1")&(UA == "A2")&(HGB
== "A1")&(Na == "A0"), method = "ls", n = 10^6)
cpquery(bn_model, event = (AKI == "A1"),evidence = ( SITE=="A1")&(UA == "A0")&(HGB
== "A0")&(Na == "A1"), method = "ls", n = 10^6)

```

```

#compute error rate
evidence_dc <- data.frame(aki_dc_bn)
pred_dc_err <- predict(bn_model, "AKI", evidence_dc, method = "bayes-lw",prob = TRUE)

table(aki_dc_bn$AKI,pred_dc_err)
error_rate_dc <- mean(aki_dc_bn[,1]!= pred_dc_err)
print(error_rate_dc)

# estimate ROC and AUC
prob_dc <- t(attr(pred_dc_err, "prob"))[,2]
library(pROC)
roc_dc_bn <- roc(aki_dc_bn$AKI, prob_dc)
print(roc_dc_bn)
ci(roc_dc_bn)
plot_roc_dc_bn <- plot.roc(roc_dc_bn, col="red",print.auc=FALSE, max.auc.polygon=FALSE,
                          print.thres=FALSE,auc.polygon=FALSE,legacy.axes=TRUE)

#error rate and AUC in validation cohort dataset
aki_vc_bn <- read.csv(file="aki_vc_lasso_bn.csv")
evidence_vc <- data.frame(aki_vc_bn)
pred_vc_err <- predict(bn_model, "AKI", evidence_vc, method = "bayes-lw",prob = TRUE)

table(aki_vc_bn$AKI,pred_vc_err)
error_rate_vc <- mean(aki_vc_bn[,1]!= pred_vc_err)
print(error_rate_vc)

prob_vc <- t(attr(pred_vc_err, "prob"))[,2]
roc_vc_bn <- roc(aki_vc_bn$AKI, prob_vc)
print(roc_vc_bn)
ci(roc_vc_bn)
plot_roc_vc_bn <- plot.roc(roc_vc_bn, col="blue",print.auc=FALSE, max.auc.polygon=FALSE,
                          print.thres=FALSE,auc.polygon=FALSE,legacy.axes=TRUE,add
                          = TRUE)

#-----Decision Tree Classification -----#

install.packages("tree")
library(tree)

aki_dc_ml <- read.csv(file="aki_dc_lasso_ml.csv")
aki_vc_ml <- read.csv(file="aki_vc_lasso_ml.csv")

```

```

for (i in 1:12) {
  aki_dc_ml[,i] <- as.factor(aki_dc_ml[,i])
}
str(aki_dc_ml)

for (i in 1:12) {
  aki_vc_ml[,i] <- as.factor(aki_vc_ml[,i])
}
str(aki_vc_ml)

#creating decision tree model
aki_tree = tree(factor(AKI) ~., aki_dc_ml)
summary(aki_tree)
aki_tree

cv_aki_tree <- cv.tree(aki_tree)0
plot(cv_aki_tree$size, cv_aki_tree$dev, type='b')

aki_tree_prun <- prune.tree(aki_tree,best=6)
plot(aki_tree_prun)
text(aki_tree_prun,pretty=0)

#error rate
error_rate_dc_tree<- predict(aki_tree_prun, data=aki_dc_ml[,-1],type="class")
mean(aki_dc_ml$AKI != error_rate_dc_tree)
table(aki_dc_ml$AKI, error_rate_dc_tree)

error_rate_vc_tree<- predict(aki_tree_prun, newdata=aki_vc_ml[,-1],type="class")
mean(aki_vc_ml$AKI != error_rate_vc_tree)
table(aki_vc_ml$AKI, error_rate_vc_tree)

#ROC and AUC
error_rate_dc_tree2<- predict(aki_tree_prun, data=aki_dc_ml[,-1])
error_rate_vc_tree2<- predict(aki_tree_prun, newdata=aki_vc_ml[,-1])

roc_dc_tree <- roc(aki_dc_ml$AKI, error_rate_dc_tree2[,2])
print(roc_dc_tree)
ci(roc_dc_tree)
plot_dc_tree <- plot.roc(roc_dc_tree, col="red",print.auc=FALSE, max.auc.polygon=FALSE,
                        print.thres=FALSE,auc.polygon=FALSE,legacy.axes=TRUE)

roc_vc_tree <- roc(aki_vc_ml$AKI, error_rate_vc_tree2[,2])
print(roc_vc_tree)
ci(roc_vc_tree)

```



```
plot_vc_tree <- plot.roc(roc_vc_tree, col="blue",print.auc=FALSE, max.auc.polygon=FALSE,
                        print.thres=FALSE,auc.polygon=FALSE,legacy.axes=TRUE,add
                        = TRUE)
```

```
#-----Random Forest Regression -----#
```

```
install.packages("randomForest")
library(randomForest)
```

```
#creating random forest model
aki_rf <- randomForest(AKI~.,data=aki_dc_ml,importance=TRUE)
aki_rf
importance(aki_rf)
varImpPlot(aki_rf)
```

```
#error rate
error_rate_dc_rf<- predict(aki_rf, data=aki_dc_ml[,-1],type="class")
mean(aki_dc_ml$AKI != error_rate_dc_rf)
table(aki_dc_ml$AKI, error_rate_dc_rf)
```

```
error_rate_vc_rf<- predict(aki_rf, newdata=aki_vc_ml[,-1],type="class")
mean(aki_vc_ml$AKI != error_rate_vc_rf)
table(aki_vc_ml$AKI, error_rate_vc_rf)
```

```
#ROC and AUC
roc_dc_rf <- roc(aki_dc_ml$AKI, as.numeric(error_rate_dc_rf))
print(roc_dc_rf)
ci(roc_dc_rf)
plot_dc_rf <- plot.roc(roc_dc_rf, col="red",print.auc=FALSE, max.auc.polygon=FALSE,
                     print.thres=FALSE,auc.polygon=FALSE,legacy.axes=TRUE)
```

```
roc_vc_rf <- roc(aki_vc_ml$AKI, as.numeric(error_rate_vc_rf))
print(roc_vc_rf)
ci(roc_vc_rf)
plot_vc_rf <- plot.roc(roc_vc_rf, col="blue",print.auc=FALSE, max.auc.polygon=FALSE,
                     print.thres=FALSE,auc.polygon=FALSE,legacy.axes=TRUE,add
                     = TRUE)
```

```
#-----Support Vector Machine Regression -----#
```

```
install.packages("e1071")
library(e1071)
```

```
#creating svm model
```

```

aki_svm_tune <- tune(svm, factor(AKI)~., data=aki_dc_ml, ranges = list(cost
=c(1,10),gamma=c(0.1,0.5)))
summary(aki_svm_tune)
aki_svm_tune$best.parameters

aki_svm <- svm(factor(AKI)~.,data=aki_dc_ml, scale=F, gamma=0.5, cost=1)
summary(aki_svm)
aki_svm$fitted

#error rate
error_rate_dc_svm <- predict(aki_svm, data=aki_dc_ml[,-1])
mean(aki_dc_ml[,1]!= error_rate_dc_svm)

error_rate_vc_svm <- predict(aki_svm, newdata=aki_vc_ml[,-1])
mean(aki_vc_ml[,1]!= error_rate_vc_svm)

#ROC and AUC
roc_dc_svm <- roc(aki_dc_ml$AKI, as.numeric(error_rate_dc_svm))
print(roc_dc_svm)
ci(roc_dc_svm)
plot_dc_svm <- plot.roc(roc_dc_svm, col="red",print.auc=FALSE, max.auc.polygon=FALSE,
print.thres=FALSE,auc.polygon=FALSE,legacy.axes=TRUE)

roc_vc_svm <- roc(aki_vc_ml$AKI, as.numeric(error_rate_vc_svm))
print(roc_vc_svm)
ci(roc_vc_svm)
plot_vc_svm <- plot.roc(roc_vc_svm, col="blue",print.auc=FALSE, max.auc.polygon=FALSE,
print.thres=FALSE,auc.polygon=FALSE,legacy.axes=TRUE,add
= TRUE)

#-----Naive Bayes Model -----#

install.packages("klaR")
library(klaR)

#creating naive bayes model
aki_nb_structure <- naive.bayes(aki_dc_ml, training = "AKI")
aki_nb <- bn.fit(aki_nb_structure, aki_dc_ml)

#error rate
error_rate_dc_nb <- predict(aki_nb, aki_dc_ml,prob = TRUE)
mean(aki_dc_ml[,1]!= error_rate_dc_nb)
table(aki_dc_ml$AKI,error_rate_dc_nb)

```

```

error_rate_vc_nb <- predict(aki_nb, aki_vc_ml,prob = TRUE)
mean(aki_vc_ml[,1]!= error_rate_vc_nb)
table(aki_vc_ml$AKI,error_rate_vc_nb)

#ROC and AUC
prob_dc_nb <- t(attr(error_rate_dc_nb, "prob"))[,2]
prob_vc_nb <- t(attr(error_rate_vc_nb, "prob"))[,2]

roc_dc_nb <- roc(aki_dc_ml$AKI, prob_dc_nb)
print(roc_dc_nb)
ci(roc_dc_nb)
plot_roc_dc_nb <- plot.roc(roc_dc_nb, col="red",print.auc=FALSE, max.auc.polygon=FALSE,
                          print.thres=FALSE,auc.polygon=FALSE,legacy.axes=TRUE)

roc_vc_nb <- roc(aki_vc_ml$AKI, prob_vc_nb)
print(roc_vc_nb)
ci(roc_vc_nb)
plot_roc_vc_nb <- plot.roc(roc_vc_nb, col="blue",print.auc=FALSE, max.auc.polygon=FALSE,
                          print.thres=FALSE,auc.polygon=FALSE,legacy.axes=TRUE,add
                          = TRUE)

#-----Logistic Regression Model -----#

logit_form = as.formula(paste("aki_dc_ml$AKI~ ",paste(names(aki_dc_ml[,-
1]),collapse='+')))
aki_logit <- glm(logit_form,data=aki_dc_ml,family=binomial(link = "logit"))

#error rate
error_rate_dc_logit <- predict(aki_logit, data=aki_dc_ml[,-1],type="response")
error_rate_dc_logit2=ifelse(error_rate_dc_logit>0.5,1,0)
mean(aki_dc_ml[,1]!= error_rate_dc_logit2)
table(aki_dc_ml$AKI,error_rate_dc_logit2)

error_rate_vc_logit <- predict(aki_logit, newdata=aki_vc_ml[,-1],type="response")
error_rate_vc_logit2=ifelse(error_rate_vc_logit>0.5,1,0)
mean(aki_vc_ml[,1]!= error_rate_vc_logit2)
table(aki_vc_ml$AKI,error_rate_vc_logit2)

#ROC and AUC
roc_dc_logit <- roc(aki_dc_ml$AKI, error_rate_dc_logit)
print(roc_dc_logit)
ci(roc_dc_logit)
plot_dc_logit <- plot.roc(roc_dc_logit, col="red",print.auc=FALSE, max.auc.polygon=FALSE,
                          print.thres=FALSE,auc.polygon=FALSE,legacy.axes=TRUE)

```

```
roc_vc_logit <- roc(aki_vc_ml$AKI, error_rate_vc_logit)
print(roc_vc_logit)
ci(roc_vc_logit)
plot_vc_logit <- plot.roc(roc_vc_logit, col="blue", print.auc=FALSE, max.auc.polygon=FALSE,
                          print.thres=FALSE, auc.polygon=FALSE, legacy.axes=TRUE, add
                          = TRUE)
```
